# Supplementary material for: RelB upregulates PD-L1 and exacerbates prostate cancer immune evasion
Source: PubMed Central journal article supplement (PMC8851785; doi:10.1186/s13046-022-02243-2), 2022-02-17
Supplement: 13046_2022_2243_MOESM4_ESM.pdf [file 13046_2022_2243_MOESM4_ESM.pdf]

## Additional file 4

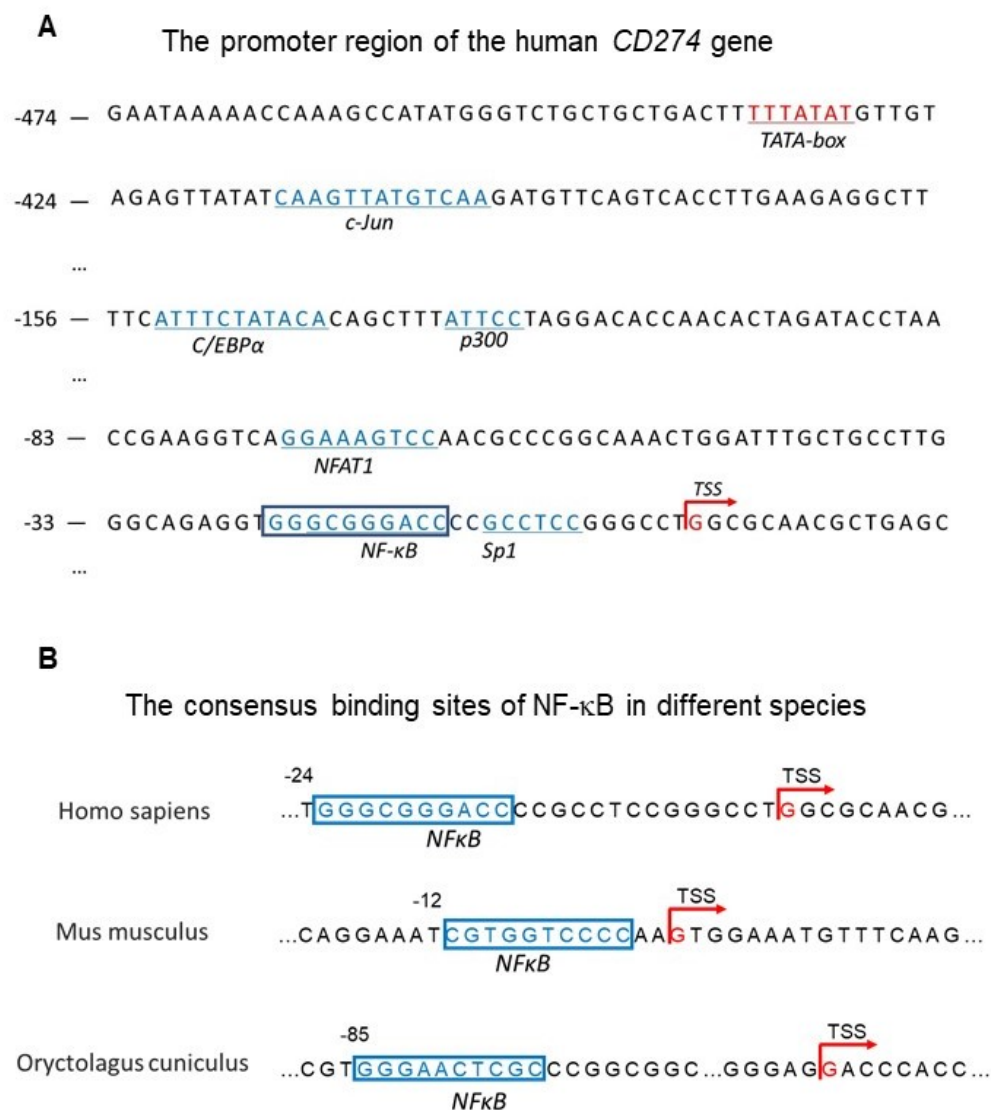

**Fig. S4. Identification of the proximal NF- $\kappa$ B element in the *CD274* genes.** **a** The sequence of the promoter region of the human *CD274* gene, **b** The conserved proximal NF- $\kappa$ B element in the *CD274* genes exists in different mammalian species. Transcription factors binding sites are boxed and the transcriptional start site (TSS) is indicated by red arrows.
