# Supplementary material for: RelB upregulates PD-L1 and exacerbates prostate cancer immune evasion
Source: PubMed Central journal article supplement (PMC8851785; doi:10.1186/s13046-022-02243-2), 2022-02-17
Supplement: 13046_2022_2243_MOESM9_ESM.pdf [file 13046_2022_2243_MOESM9_ESM.pdf]

## Additional file 9

Table S2. mRNA expression profiles in PC-3/shRelB cell vs. PC-3/shCtrl cell

| Gene name | Ctrl<br>(FPKM) | RelB-KO<br>(FPKM) | log <sub>2</sub> (RelB-KO/Ctrl) | up-or-down | P value  |
|-----------|----------------|-------------------|---------------------------------|------------|----------|
| CXCL8     | 167.11±8.17    | 72.80±8.17        | -1.20                           | down       | 5.00E-05 |
| PTPN6     | 3.48±0.38      | 1.58±0.47         | -1.14                           | down       | 5.00E-05 |
| HLA-B     | 30.86±3.63     | 6.46±0.22         | -2.26                           | down       | 5.00E-05 |
| SERPINE1  | 3.75±0.36      | 0.40±0.21         | -3.23                           | down       | 5.00E-05 |
| CD274     | 0.67±0.04      | 0.12±0.04         | -2.46                           | down       | 5.00E-05 |
| EBI3      | 1.62±0.32      | 0.57±0.24         | -1.50                           | down       | 5.00E-05 |
| CCL2      | 10.35±0.94     | 0.00±0.00         | #                               | down       | 5.00E-05 |
| SHH       | 3.76±0.42      | 0.07±0.03         | -5.79                           | down       | 5.00E-05 |
| CAV1      | 131.27±1.75    | 35.20±0.57        | -1.90                           | down       | 5.00E-05 |
| PLA2G7    | 1.63±0.19      | 0.72±0.04         | -1.19                           | down       | 5.00E-05 |
| MMP14     | 21.12±1.20     | 9.99± 0.25        | -1.08                           | down       | 5.00E-05 |
| STAT6     | 10.67±0.63     | 0.71±0.12         | -3.90                           | down       | 5.00E-05 |
| INHBA     | 11.71±0.76     | 2.01±0.17         | -2.54                           | down       | 5.00E-05 |
| AXL       | 6.06±0.06      | 1.98±0.17         | -1.62                           | down       | 5.00E-05 |
| GPR68     | 0.94±0.12      | 0.14±0.06         | -2.78                           | down       | 5.00E-05 |
| PIK3AP1   | 0.66±0.10      | 0.06±0.01         | -3.41                           | down       | 5.00E-05 |
| PSMB9     | 1.94±0.51      | 0.69±0.31         | -1.48                           | down       | 5.00E-05 |
| HOXA5     | 0.47±0.04      | 0.11±0.00         | -2.04                           | down       | 0.00465  |
| C3        | 32.55±0.56     | 14.07±0.27        | -1.21                           | down       | 5.00E-05 |
| Fas       | 3.93±0.47      | 2.99±0.32         | -0.40                           | down       | 0.06405  |
| VNN1      | 12.35±0.41     | 40.31±2.58        | 1.71                            | up         | 5.00E-05 |
| MYB       | 6.09±0.31      | 11.96±0.45        | 0.97                            | up         | 5.00E-05 |
| CR2       | 0.88±0.13      | 2.09±0.16         | 1.24                            | up         | 5.00E-05 |
| CD86      | 0.84±0.18      | 1.88±0.37         | 1.16                            | up         | 5.00E-05 |
| TNFRSF18  | 1.25±0.44      | 3.82±0.13         | 1.62                            | up         | 5.00E-05 |
| FCGR2A    | 3.71±0.26      | 7.46±0.40         | 1.01                            | up         | 5.00E-05 |
