# Supplementary material for: RelB upregulates PD-L1 and exacerbates prostate cancer immune evasion
Source: Springer Nature journal article supplement (doi:10.1186/s13046-022-02243-2), 2022-02-17
Supplement: MOESM1 [file 20142432]

# Additional file 1

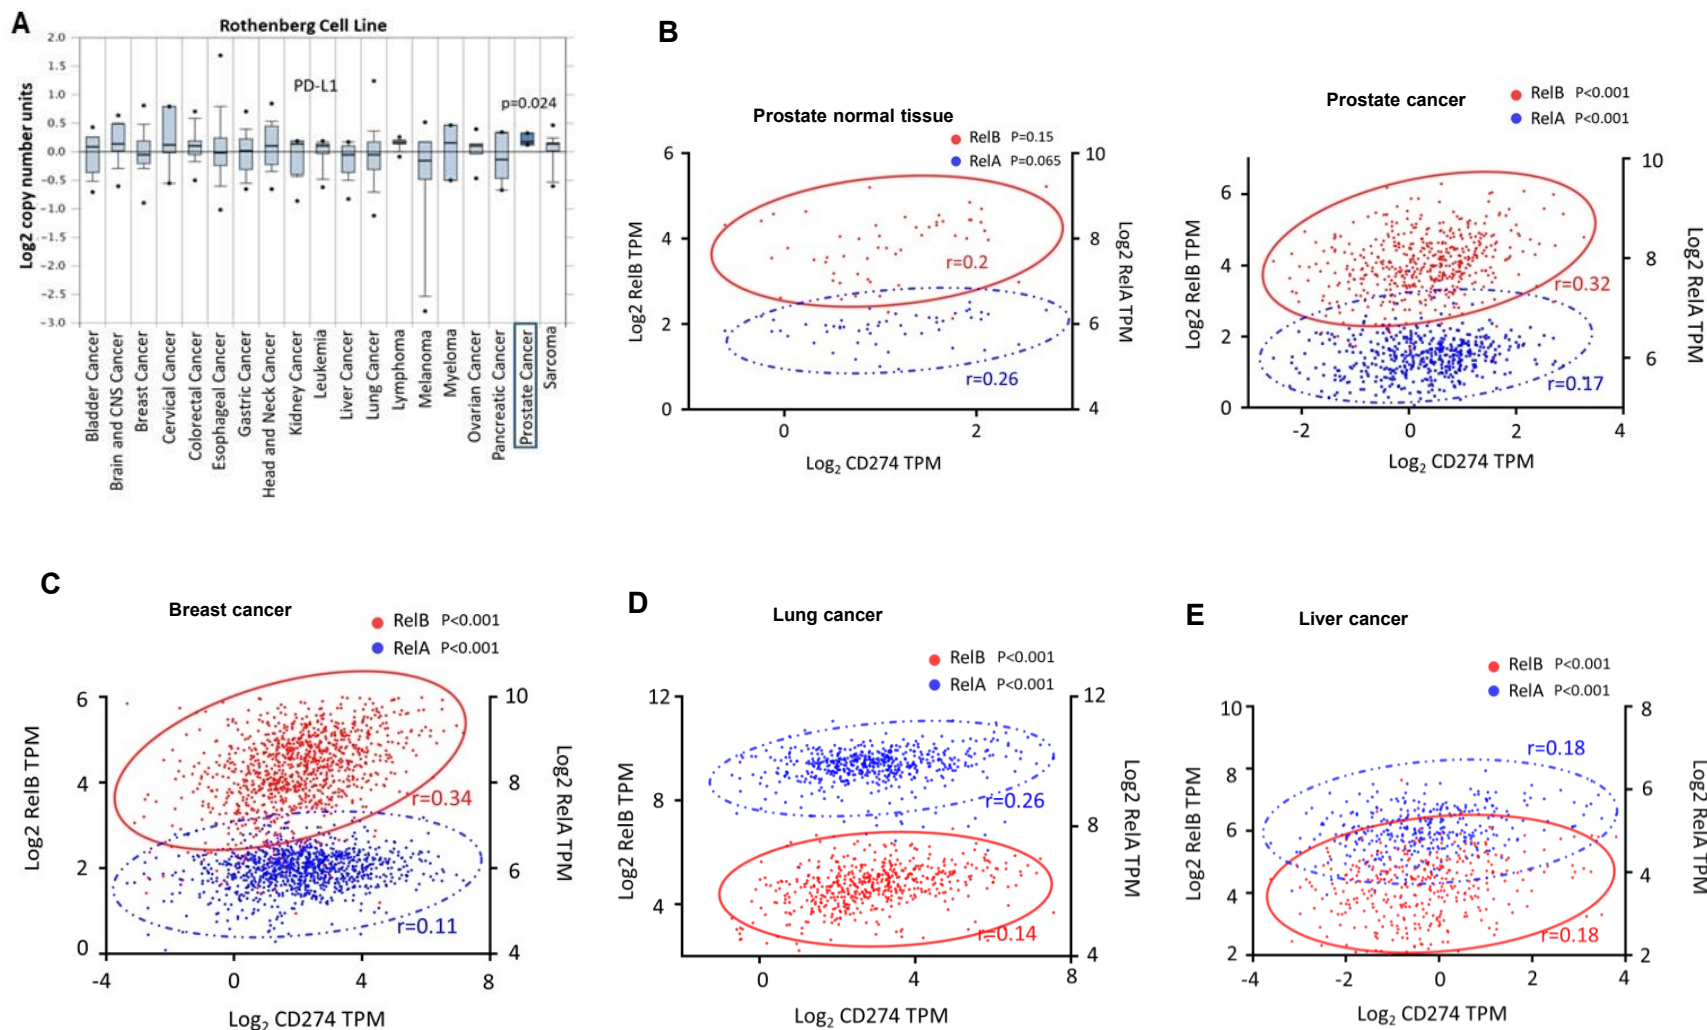

**Fig. S1. The correlation of RelB and PD-L1 in Cancers.** The association between RelB and PD-L1 in cancers was analysed using Oncomine<sup>TM</sup> and TCGA public databases. **a** Per searching the PD-L1 expression profiles in various types of human cancer, PD-L1 is frequently elevated in tumour tissues compared to the corresponding peritumoral tissues. \*( $p < 0.05$ ) indicates the significance and the data in PCa is indicated in a box. **b** The correlation between RelA/RelB and PD-L1 in PCa vs. normal prostate tissues. **c** The correlation between RelA/RelB and PD-L1 in breast cancer. **d-e** The correlation between RelA/RelB and PD-L1 in lung and liver cancers.
