# Supplementary material for: RelB upregulates PD-L1 and exacerbates prostate cancer immune evasion
Source: Springer Nature journal article supplement (doi:10.1186/s13046-022-02243-2), 2022-02-17
Supplement: MOESM2 [file 20142432]

## Additional file 2

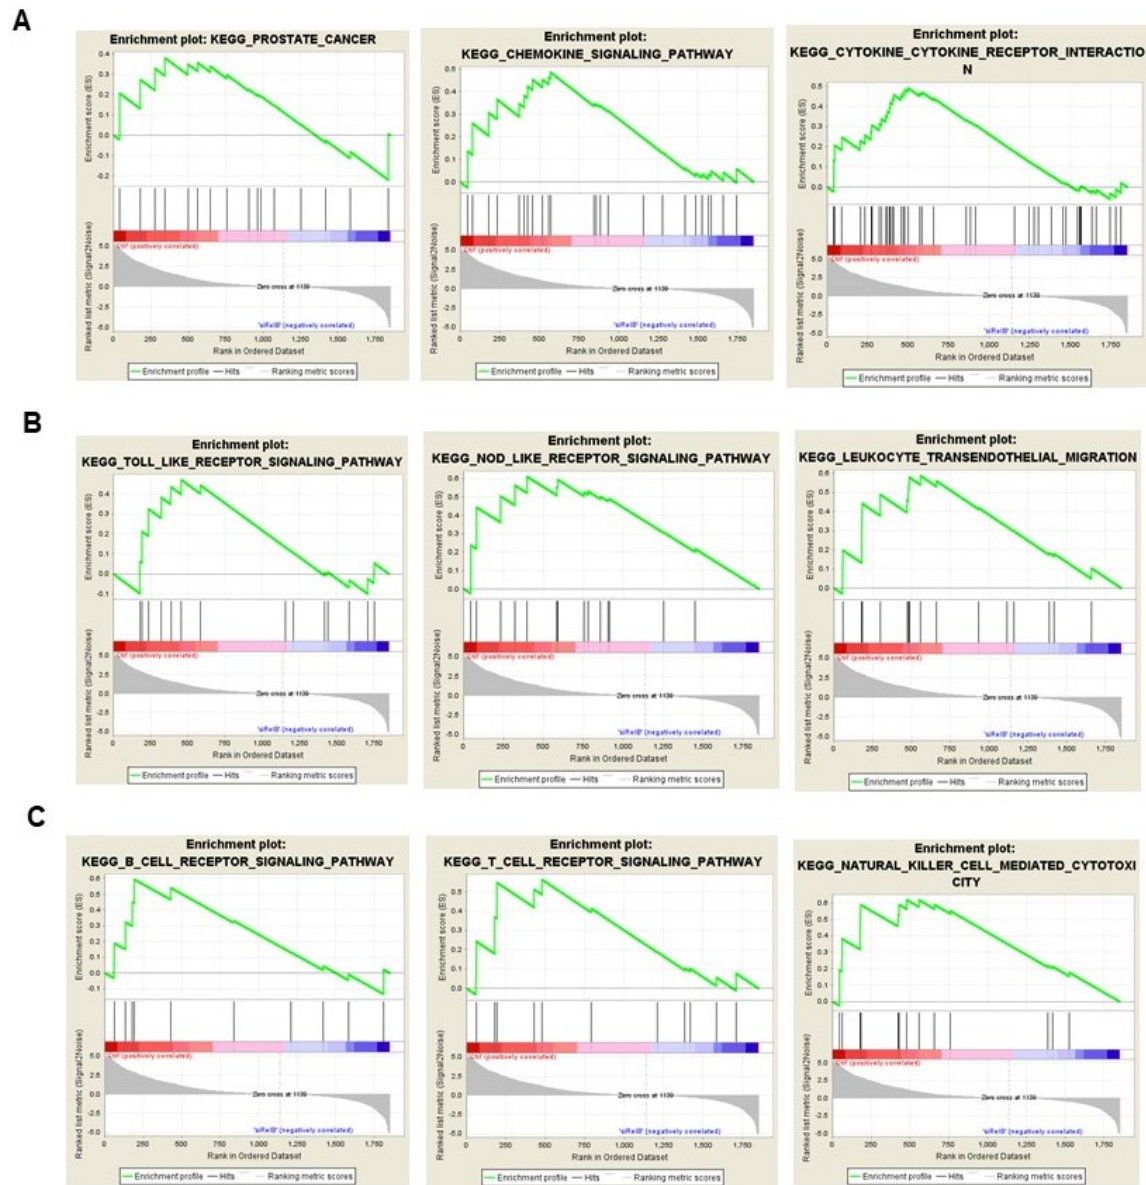

**Fig. S2. Comparison of mRNA expression profiles in RelB-silenced PC-3 cells vs. control cells.** Total RNA was extracted from shRelB and shCtrl PC-3 cells. The mRNA expression profiles were examined by RNA-Seq. **a** KEGG pathway enrichment analysis was performed to assess the association of altered mRNA profiles with cytokine/chemokine-activated signalling pathways. **b-c** The altered mRNA profiles are also related to oncogenic receptor-mediated signalling pathways and the immune response.
