# Supplementary material for: RelB upregulates PD-L1 and exacerbates prostate cancer immune evasion
Source: Springer Nature journal article supplement (doi:10.1186/s13046-022-02243-2), 2022-02-17
Supplement: MOESM6 [file 20142432]

## Additional file 6

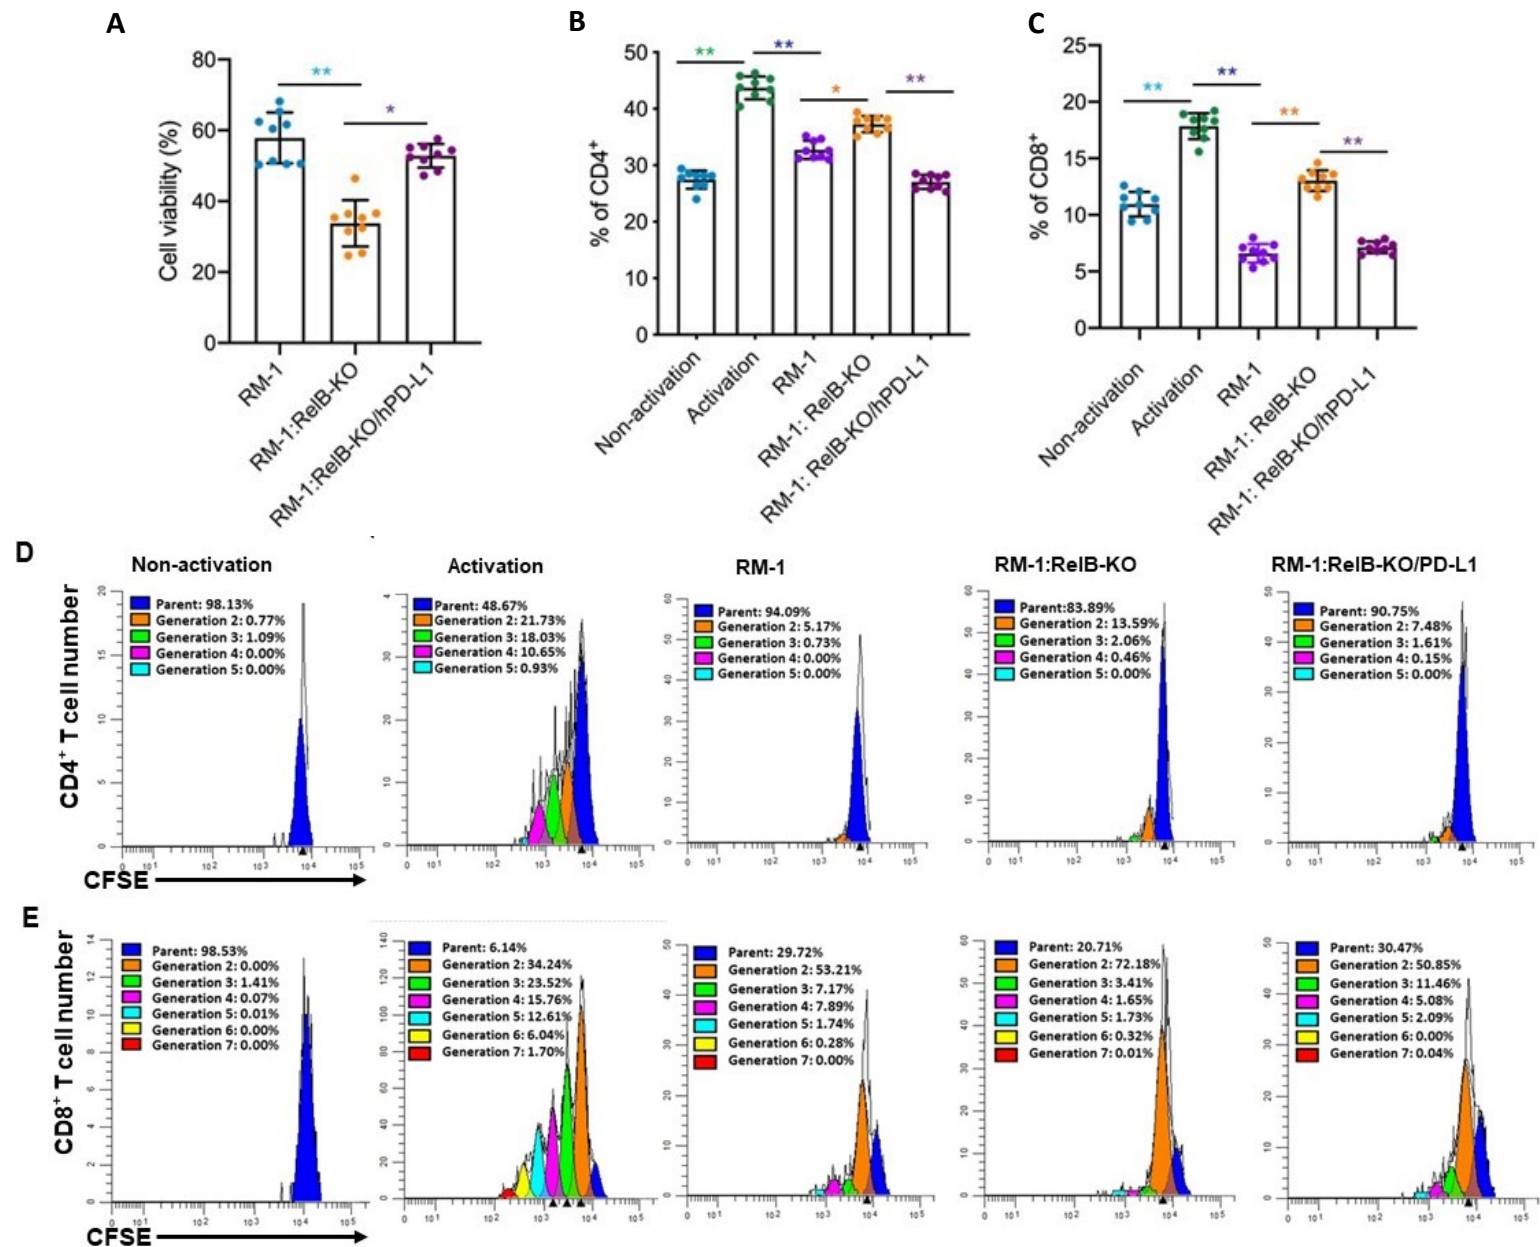

**Fig. S6. Enhancement of CD4<sup>+</sup> and CD8<sup>+</sup> cells by knockout of RelB in RM-1 cells.** **a** Activated mouse T cells were cocultured with RM-1 cell lines in which RelB and PD-L1 were manipulated. T-cell induced cytotoxicity in RM-1 cell lines was determined by MTT assay. **b-c** The effects of RM-1 cell lines on numbers of CD4<sup>+</sup> and CD8<sup>+</sup> cells were quantified by flow cytometry. **d-e** The proliferation of CD4<sup>+</sup> and CD8<sup>+</sup> cells was further analysed by flow cytometry. \*( $p < 0.05$ ) and \*\*( $p < 0.01$ ) show significance between the two groups as indicated.
