# Supplementary material for: RelB upregulates PD-L1 and exacerbates prostate cancer immune evasion
Source: Springer Nature journal article supplement (doi:10.1186/s13046-022-02243-2), 2022-02-17
Supplement: MOESM7 [file 20142432]

## Additional file 7

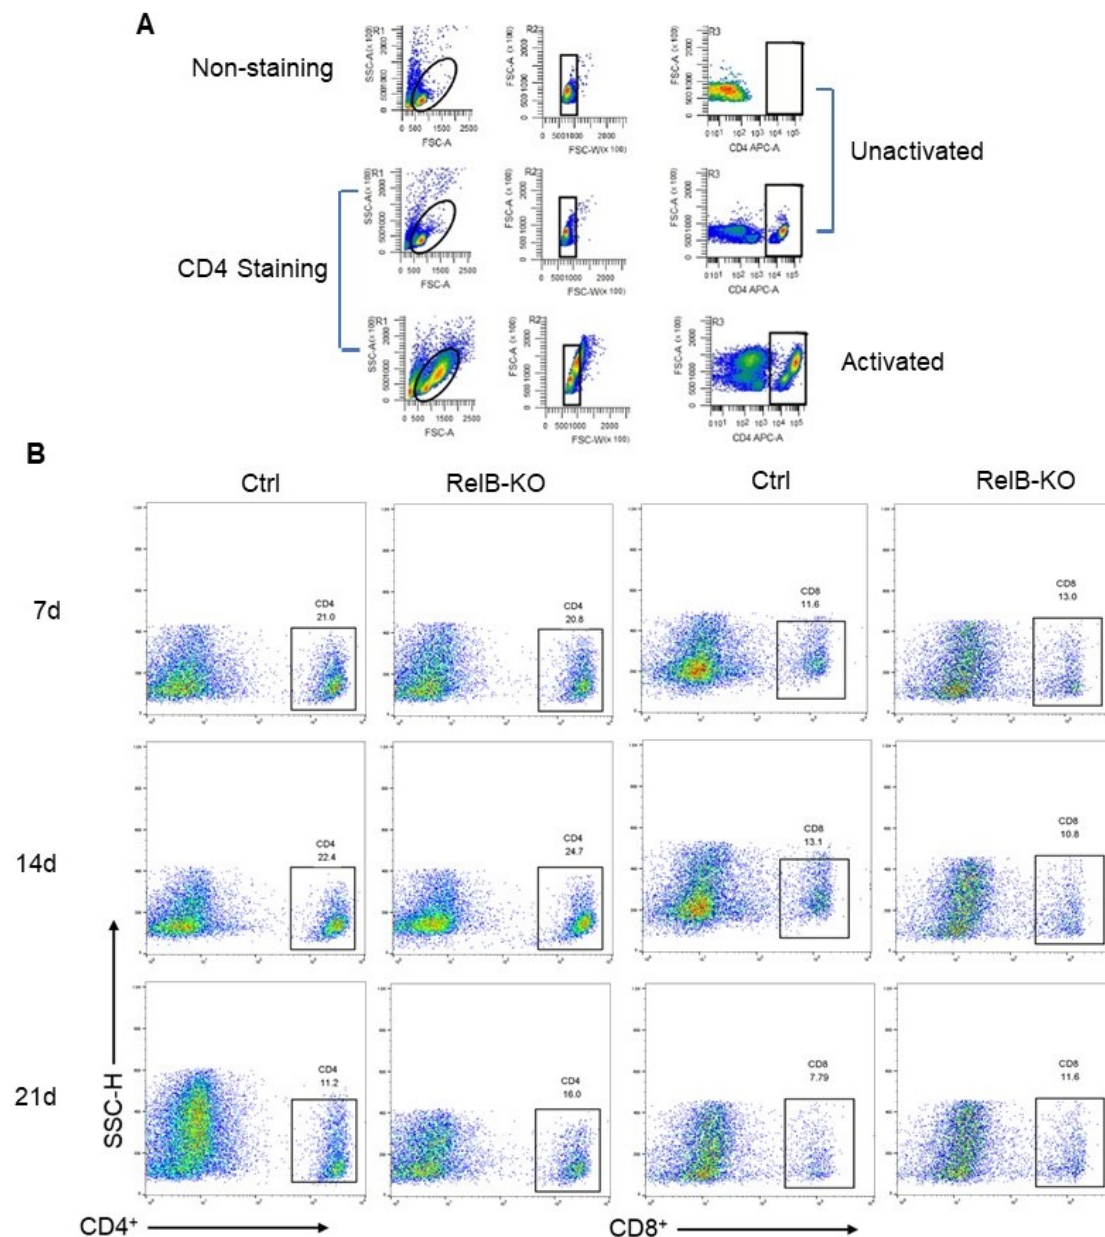

**Fig. S7. Activation of mouse CD4<sup>+</sup> and CD8<sup>+</sup> cells by injection of RM-1 cells.** **a** T cells were isolated from mouse blood samples and activated by CD3 and CD28 stimulation. The activated T cells were qualified by CD4 staining. **b** After RM-1 cell injection, blood samples were drawn from mice on different days as indicated. The fractions of CD4<sup>+</sup> and CD8<sup>+</sup> cells were examined by flow cytometry with relative antibodies.
