# Supplementary material for: RelB upregulates PD-L1 and exacerbates prostate cancer immune evasion
Source: Springer Nature journal article supplement (doi:10.1186/s13046-022-02243-2), 2022-02-17
Supplement: MOESM8 [file 20142432]

## Additional file 8

Table S1. Sequences of RT-qPCR/ChIP primers and EMSA probes

| RT-qPCR primer |          | Sequence                                                                         |
|----------------|----------|----------------------------------------------------------------------------------|
| CD274          |          | Forward: 5'- GGAGCCATCTTATTATGCCTT-3'<br>Reverse: 5'- GTTTGTATCTTGGATGCCACA-3'   |
| GAPDH          |          | Forward: 5'- TCTGACTTCAACAGCGACACC-3'<br>Reverse: 5'- CTGTTGCTGTAGCCAAATTCGTT-3' |
| ChIP primer    | Location | Sequence                                                                         |
| E1.            | -1289    | Forward: 5'-GCAGTACCTGTAAACTGTATTGCC-3'<br>Reverse: 5'-GTTCTCTTTGGCCCAATAA-3'    |
| E2.            | -364     | Forward: 5'-ATATGGGTCTGCTGCTGACTTT-3'<br>Reverse: 5'-ACAACAAGCCAACATCTGAACG-3'   |
| E3.            | -21      | Forward: 5'-ATTTACCGAAGGTCAGGAA-3'<br>Reverse: 5'-AGCGAGCTAGCCAGAGATACTG-3'      |
| EMSA probe     |          | Sequence                                                                         |
| Wild type      |          | Forward: 5'-AGAGGTGGGCGGGACCCCGCCTC-3'<br>Reverse: 5'-GAGGCGGGGTCCCGCCCACCTCT-3' |
| Mutant         |          | Forward: 5'-AGAGGTGTGCATCTGCATGCCTC-3'<br>Reverse: 5'-GAGGCATGCAGATGCACACCTCT-3' |
